# Supplementary material
Source: Research Square preprint supplement (doi:10.21203/rs.3.rs-9511390/v1)
Supplement: Supplementary file 1 [file 7006f2ba2f14e5b2adca2f4f.docx]

eTable1. Characteristics and Neurodevelopmental Outcomes by Hospitalization Count

| Variable | No of Hospitalization | | | HR  (1 vs 2) | HR  (1 vs 3) | p-value |
| --- | --- | --- | --- | --- | --- | --- |
| 5-91,  n (%) | 10-192,  n (%) | ≥203,  n (%) |
| n | 157799 | 24606 | 2114 |  |  |  |
| Female, n (%) | 71253 (45.2) | 11066 (45.0) | 1018 (48.2) |  |  | 0.018 |
| Epilepsy within first year, n (%) | 847 (0.5) | 153 (0.6) | 18 (0.9) |  |  | 0.043 |
| Asthma within first year, n (%) | 43068 (27.3) | 6764 (27.5) | 535 (25.3) |  |  | 0.097 |
| Perinatal period disease, n (%) | 43461 (27.5) | 7420 (30.2) | 684 (32.4) |  |  | <.001 |
| Congenital malformation, n (%) | 15621 ( 9.9) | 2420 ( 9.8) | 190 ( 9.0) |  |  | 0.366 |
| IDD | 2394 ( 1.5) | 607 ( 2.5) | 70 ( 3.3) | **1.57**  **(1.44–1.72)** | **2.03**  **(1.60–2.58)** |  |
| DD | 6097 ( 3.9) | 1387 ( 5.6) | 148 ( 7.0) | **1.46**  **(1.37–1.54)** | **1.80**  **(1.53–2.12)** |  |
| ADHD | 6759 ( 4.3) | 1362 ( 5.5) | 141 ( 6.7) | **1.24**  **(1.17–1.31)** | **1.42**  **(1.21–1.68)** |  |
| Any mental disorder | 11673 ( 7.4) | 2476 (10.1) | 256 (12.1) | **1.34**  **(1.28–1.40)** | **1.58**  **(1.40–1.79)** |  |
| IDD  with psychotropic agent | 907 ( 0.6) | 265 ( 1.1) | 25 ( 1.2) | **1.77**  **(1.54–2.03)** | **1.82**  **(1.22–2.71)** |  |
| DD  with psychotropic agent | 1376 ( 0.9) | 308 ( 1.3) | 43 ( 2.0) | **1.40**  **(1.23–1.58)** | **2.21**  **(1.63–3.00)** |  |
| ADHD with psychotropic agent | 5232 ( 3.3) | 1078 ( 4.4) | 114 ( 5.4) | **1.25**  **(1.17–1.34)** | **1.46**  **(1.22–1.76)** |  |
| Any mental disorder with psychotropic agent | 6020 (3.8) | 1283 (5.2) | 141 (6.7) | **1.31**  **(1.23–1.39)** | **1.60**  **(1.36–1.89)** |  |

1 = 5–9 hospitalizations; 2 = 10–19 hospitalizations; 3 = ≥20 hospitalizations.

Values are presented as number (percentage) unless otherwise indicated.

**Boldface indicates statistical significance at p < 0.05.**

Hazard ratios (HRs) and 95% confidence intervals (CIs) are shown for Group 2 and Group 3 compared with Group 1.

P values are based on χ² tests for categorical variables and represent comparisons across the 3 groups.

For neurodevelopmental outcomes, Cox proportional hazards models were used to estimate hazard ratios adjusted for sex, perinatal conditions, congenital malformations, and asthma or epilepsy during the first year of life.

Abbreviations: IDD: Intellectual developmental disorder ; DD: Pervasive developmental disorder NOS; ADHD: Attention Deficit Hyperactivity Disorder

eTable 2. Dose–Response Relationship by Number of Anti-Infective Agents Used

| Variable | Number of Anti-infective agents | | | HR  (1 vs 2) | HR  (1 vs 3) | p-value |
| --- | --- | --- | --- | --- | --- | --- |
| 1-4 agents¹, n (%) | 5-9 agents², n (%) | ≥10 agents ³, n (%) |
| n | 9063 | 115768 | 59688 |  |  |  |
| Female, n (%) | 4183 (46.2) | 52647 (45.5) | 26507 (44.4) |  |  | <0.001 |
| Epilepsy within first year, n (%) | 32 (0.4) | 544 (0.5) | 442 (0.7) |  |  | <0.001 |
| Asthma within first year, n (%) | 2400 (26.5) | 31398 (27.1) | 16569 (27.8) |  |  | 0.004 |
| Perinatal period disease, n (%) | 2345 (25.9) | 31486 (27.2) | 17734 (29.7) |  |  | <0.001 |
| Congenital malformation, n (%) | 844 (9.3) | 11128(9.6) | 6259(10.5) |  |  | <0.001 |
| IDD | 104 (1.1) | 1620 (1.4) | 1347 (2.3) | 1.22  (1.00-1.49) | **1.92**  **(1.58–2.35)** |  |
| DD | 299 (3.3) | 4245 (3.7) | 3088 (5.2) | 1.1  (0.99–1.25) | **1.57**  **(1.40–1.8)** |  |
| ADHD | 342 (3.8) | 4838 (4.2) | 3082 (5.2) | 1.11  (1.00–1.23) | **1.33**  **(1.19–1.49)** |  |
| Any mental disorder | 579 (6.4) | 8179 (7.1) | 5647 (9.5) | **1.11**  **(1.02–1.20)** | **1.48**  **(1.36–1.61)** |  |
| IDD  with psychotropic agent | 31 (0.3) | 645 (0.6) | 521 (0.9) | **1.63**  **(1.13–2.33)** | **2.45**  **(1.71–3.52)** |  |
| DD  with psychotropic agent | 62 (0.7) | 975 (0.8) | 690 (1.2) | 1.23  (0.95–1.59) | **1.66**  **(1.28–2.15)** |  |
| ADHD with psychotropic agent | 249 (2.7) | 3734 (3.2) | 2441 (4.1) | **1.17**  **(1.03–1.33)** | **1.4**  **(1.26–1.64)** |  |
| Any mental disorder with psychotropic agent | 281 (3.1) | 4276 (3.7) | 2887 (4.8) | **1.19**  **(1.06–1.34)** | **1.52**  **(1.34–1.72)** |  |

¹ = 1–4 agents; 2 = 5–9 agents; 3 = ≥10 agents.
Values are presented as number (percentage) unless otherwise indicated. **Boldface indicates statistical significance at p < 0.05.**
Hazard ratios (HRs) and 95% confidence intervals (CIs) are shown for Group 2 and Group 3 compared with Group 1.
P values are based on χ² tests for categorical variables and represent comparisons across the 3 groups.
For neurodevelopmental outcomes, Cox proportional hazards models were used to estimate hazard ratios adjusted for sex, perinatal conditions, congenital malformations, and asthma or epilepsy during the first year of life.
Abbreviations: IDD: Intellectual developmental disorder; DD: Pervasive developmental disorder NOS; ADHD: Attention Deficit Hyperactivity Disorder

eTable 3. Neurodevelopmental Outcomes by Number of Antibacterial Agents Used

| Variable | Number of Anti-bacterial agents | | | HR  (1 vs 2) | HR  (1 vs 3) | p-value |
| --- | --- | --- | --- | --- | --- | --- |
| 0-4 agents¹, n (%) | 5-9 agents2, n (%) | ≥10 agents3, n (%) |
| n | 15580 | 125900 | 43039 |  |  |  |
| Female, n (%) | 7267 (46.6) | 57139 (45.4) | 18931 (44.0) |  |  | <0.001 |
| Epilepsy within first year, n (%) | 62 (0.4) | 584 (0.5) | 372 (0.9) |  |  | <0.001 |
| Asthma within first year, n (%) | 4098 (26.3) | 34178 (27.1) | 12091 (28.1) |  |  | <0.001 |
| Perinatal period disease, n (%) | 4043 (25.9) | 34484 (27.4) | 13038 (30.3) |  |  | <0.001 |
| Congenital malformation, n (%) | 1480 (9.5) | 12197 (9.7) | 4554 (10.6) |  |  | <0.001 |
| IDD | 169 (1.1) | 1797 (1.4) | 1105 (2.6) | **1.29**  **(1.10–1.51)** | **2.24**  **(1.91–2.64)** |  |
| DD | 490 (3.1) | 4728 (3.8) | 2414 (5.6) | **1.19**  **(1.08-1.31)** | **1.78**  **(1.62–1.96)** |  |
| ADHD | 581 (3.7) | 5335 (4.2) | 2346 (5.5) | **1.10**  **(1.01–1.20)** | **1.36**  **(1.24–1.49)** |  |
| Any mental disorder | 971 (6.2) | 9057 (7.2) | 4377 (10.2) | **1.14**  **(1.07–1.22)** | **1.60**  **(1.49–1.71)** |  |
| IDD  with psychotropic agent | 64 (0.4) | 702 (0.6) | 431 (1.0) | **1.31**  **(1.01–1.69)** | **2.22**  **(1.70–2.88)** |  |
| DD  with psychotropic agent | 106 (0.7) | 1075 (0.9) | 546 (1.3) | **1.23**  **(1.01–1.51)** | **1.79**  **(1.45–2.20)** |  |
| ADHD with psychotropic agent | 428 (2.7) | 4153 (3.3) | 1843 (4.3) | **1.16**  **(1.05–1.28)** | **1.44**  **(1.29–1.59)** |  |
| Any mental disorder with psychotropic agent | 488 (3.1) | 4736 (3.8) | 2220 (5.2) | **1.17**  **(1.06–1.28)** | **1.54**  **(1.39–1.69)** |  |

¹ Group 1 = 0–4 agents; Group 2 = 5–9 agents; Group 3 = ≥10 agents.
Values are presented as number (percentage) unless otherwise indicated. **Boldface indicates statistical significance at p < 0.05.**
Hazard ratios (HRs) and 95% confidence intervals (CIs) are shown for Group 2 and Group 3 compared with Group 1.
P values are based on χ² tests for categorical variables and represent comparisons across the 3 groups.
For neurodevelopmental outcomes, Cox proportional hazards models were used to estimate hazard ratios adjusted for sex, perinatal conditions, congenital malformations, and asthma or epilepsy during the first year of life.
Abbreviations: IDD: Intellectual developmental disorder; DD: Pervasive developmental disorder NOS; ADHD: Attention Deficit Hyperactivity Disorder;

eTable 4. Neurodevelopmental Outcomes by Exposure vs Non-Exposure to Antimycotic Agents

| Variable | No use¹ n (%) | Use² n (%) | HR  (No use vs Use) | p-value |
| --- | --- | --- | --- | --- |
| n | 172690 | 11829 |  |  |
| Female, n (%) | 78067 (45.2) | 5270 (44.6) |  | 0.169 |
| Epilepsy within first year, n (%) | 870 (0.5) | 148 (1.3) |  | <0.001 |
| Asthma within first year, n (%) | 47067 (27.3) | 3300 (27.9) |  | 0.132 |
| Perinatal period disease, n (%) | 47987 (27.8) | 3578 (30.2) |  | <0.001 |
| Congenital malformation, n (%) | 16948 (9.8) | 1283 (10.8) |  | <0.001 |
| IDD | 2706 (1.6) | 365 (3.1) | **1.93 (1.73–2.15)** |  |
| DD | 6901 (4.0) | 731 (6.2) | **1.55 (1.44–1.68)** |  |
| ADHD | 7636 (4.4) | 626 (5.3) | **1.16 (1.07–1.26)** |  |
| Any mental disorder | 13132 (7.6) | 1273 (10.8) | **1.41 (1.34–1.50)** |  |
| IDD  with psychotropic agent | 1068 (0.6) | 129 (1.1) | **1.69 (1.41–2.03)** |  |
| DD  with psychotropic agent | 1545 (0.9) | 182 (1.5) | **1.69 (1.45–1.97)** |  |
| ADHD with psychotropic agent | 5903 (3.4) | 521 (4.4) | **1.24 (1.14–1.36)** |  |
| Any Mental Disorder with psychotropic agent | 6795 (3.9) | 649 (5.5) | **1.36 (1.25–1.47)** |  |

¹ No Use = 0 antimicrobial agents; ² Use = 1 or more agents. **Boldface indicates statistical significance at p < 0.05.**
HRs are adjusted for sex, perinatal conditions, congenital malformations, and asthma or epilepsy during the first year of life.

eTable 5. Neurodevelopmental Outcomes by Exposure vs Non-Exposure to Antiviral Agents

| Variable | No use¹ n (%) | Use² n (%) | HR  (No Use vs Use) |  | p-value |
| --- | --- | --- | --- | --- | --- |
| n | 84549 | 99970 |  |  |  |
| Female, n (%) | 37189 (44.0) | 46148 (46.2) |  |  | <0.001 |
| Epilepsy within first year, n (%) | 580 ( 0.7) | 438 ( 0.4) |  |  | 0.001 |
| Asthma within first year, n (%) | 23404 (27.7) | 26963 (27.0) |  |  | 0.829 |
| Perinatal period disease, n (%) | 23649 (28.0) | 27916 (27.9) |  |  | 0.861 |
| Congenital malformation, n (%) | 8342 ( 9.9) | 9889 ( 9.9) |  |  | <0.001 |
| IDD | 1662 ( 2.0) | 1409 ( 1.4) | **0.75 (0.70–0.81)** |  |  |
| DD | 3834 ( 4.5) | 3798 ( 3.8) | **0.84 (0.81–0.88)** |  |  |
| ADHD | 3921 ( 4.6) | 4341 ( 4.3) | 0.99 (0.95–1.04) |  |  |
| Any mental disorder | 7106 ( 8.4) | 7299 ( 7.3) | **0.89 (0.86–0.92)** |  |  |
| IDD with psychotropic agent | 610 ( 0.7) | 587 ( 0.6) | **0.88 (0.79–0.99)** |  |  |
| DD with psychotropic agent | 880 ( 1.0) | 847 ( 0.8) | **0.84 (0.76–0.92)** |  |  |
| ADHD with psychotropic agent | 3046 ( 3.6) | 3378 ( 3.4) | 1.01 (0.96–1.06) |  |  |
| Any mental disorder with psychotropic agent | 3587 ( 4.2) | 3857 ( 3.9) | 0.97 (0.92–1.01) |  |  |

Values are presented as number (percentage) unless otherwise indicated.
**Boldface indicates statistical significance at p < 0.05.**
Hazard ratios (HRs) and 95% confidence intervals (CIs) represent comparisons between exposed and unexposed groups.
Adjusted for sex, perinatal conditions, congenital malformations, and asthma or epilepsy during the first year of life.
Abbreviations: IDD: Intellectual developmental disorder; DD: Pervasive developmental disorder NOS; ADHD: Attention Deficit Hyperactivity Disorder

eTable 6. Adjusted Hazard Ratios for Neurodevelopmental Outcomes by Total Prescription Days of Anti-Infective Agents

| Variable | IDD HR | DD HR | ADHD HR | F-code HR | IDD with agent HR | DD with agent HR | ADHD with agent HR | F-code with agent HR |
| --- | --- | --- | --- | --- | --- | --- | --- | --- |
| Anti-infective agents | **1.19**  **(1.16–1.22)** | **1.15 (1.12–1.17)** | **1.04 (1.02–1.07)** | **1.11 (1.09–1.13)** | **1.19 (1.14–1.24)** | **1.14 (1.09–1.19)** | **1.05 (1.02–1.08)** | **1.09 (1.06–1.11)** |
| Antibacterial agents | **1.20 (1.17–1.23)** | **1.15 (1.13–1.18)** | **1.04 (1.02–1.07)** | **1.11 (1.10–1.13)** | **1.19 (1.14–1.24)** | **1.14 (1.10–1.19)** | **1.05 (1.02–1.08)** | **1.09 (1.06–1.11)** |
| Antimycotic agents | **5.79 (4.15–8.07)** | **3.50 (2.55–4.82)** | 1.26 (0.65–2.44) | **3.23 (2.50–4.19)** | **4.54 (2.38–8.63)** | **4.41 (2.54–7.65)** | 1.64 (0.87–3.11) | **2.83 (1.90–4.19)** |
| Antiviral agents | **0.11 (0.05–0.21)** | **0.35 (0.23–0.52)** | 1.26 (0.88–1.79) | **0.51 (0.38–0.68)** | 0.57 (0.21–1.58) | 0.45 (0.20–1.05) | 1.33 (0.88–1.99) | 1.01 (0.69–1.48) |

HRs and 95% confidence intervals (CIs) are shown per increase in total days of exposure to each anti-infective agent type.
**Boldface indicates statistical significance at p < 0.05.**
Models were adjusted for sex, perinatal conditions, congenital malformations, and asthma or epilepsy during the first year of life.
Abbreviations: ID = Intellectual developmental disorder; DD = Pervasive developmental disorder NOS; ADHD = Attention Deficit Hyperactivity Disorder.

eTable 7. Risk of Neurodevelopmental Outcomes by Age at First Infection (Unmatched Cohort)¹

| Variable | Under 1 | Age 1 | Age 2 | Age 3–5 |
| --- | --- | --- | --- | --- |
| IDD HR | Reference | **0.82 (0.76–0.89)** | **0.83 (0.72–0.95)** | **0.69 (0.55–0.87)** |
| DD HR | Reference | **0.88 (0.83–0.92)** | **0.70 (0.64–0.77)** | **0.39 (0.33–0.47)** |
| ADHD HR | Reference | 1.05 (1.00–1.10) | **1.17 (1.08–1.27)** | **1.15 (1.02–1.29)** |
| F-code HR | Reference | **0.96 (0.92–0.99)** | **0.90 (0.85–0.96)** | **0.74 (0.67–0.81)** |
| IDD with agent HR | Reference | 0.93 (0.81–1.06) | 0.99 (0.79–1.23) | 0.84 (0.59–1.21) |
| DD with agent HR | Reference | **0.87 (0.78–0.97)** | **0.82 (0.68–0.98)** | **0.49 (0.34–0.69)** |
| ADHD with agent HR | Reference | 1.04 (0.98–1.10) | **1.20 (1.10–1.31)** | **1.21 (1.06–1.39)** |
| F-code with agent HR | Reference | 0.99 (0.94–1.05) | **1.10 (1.01–1.20)** | 1.04 (0.91–1.18) |

¹ Values are hazard ratios (HRs) and 95% confidence intervals (CIs) for neurodevelopmental outcomes by age at first hospitalization for infection.
**Boldface indicates statistical significance at p < 0.05.**
HRs were adjusted for sex, perinatal conditions, congenital malformations, and asthma or epilepsy during the first year of life.
Abbreviations: IDD = Intellectual developmental disorder; DD = Pervasive developmental disorder NOS; ADHD = Attention Deficit Hyperactivity Disorder.

eTable 8. Age at First Infection and Risk of Neurodevelopmental Outcomes (PSM Model)

| Outcome | Under 1 | Age 1 | Age 2 | Age 3–5 | p for interaction |
| --- | --- | --- | --- | --- | --- |
| IDD HR | **1.30**  **(1.03–1.64)** | **2.59**  **(1.79–3.76)** | **2.27**  **(1.43–3.60)** | **2.16**  **(1.43–3.26)** | 0.006 |
| DD HR | 1.11  (0.96–1.28) | **1.99**  **(1.61–2.45)** | **2.27 (1.71–3.00)** | **1.68 (1.27–2.22)** | <0.001 |
| ADHD HR | **1.58 (1.35–1.84)** | **1.77 (1.46–2.15)** | **1.75 (1.42–2.16)** | **1.37 (1.14–1.65)** | 0.061 |
| F-code HR | **1.28 (1.15–1.43)** | **1.94 (1.67–2.25)** | **1.86 (1.56–2.21)** | **1.44 (1.23–1.69)** | <0.001 |
| IDD with agent HR | **2.20 (1.40–3.45)** | **4.43 (2.04–9.60)** | **2.12 (1.07–4.21)** | 1.86 (1.00–3.46) | 0.298 |
| DD with agent HR | 1.21 (0.88–1.66) | **1.97 (1.27–3.04)** | **3.55 (1.70–7.43)** | **2.10 (1.11–3.94)** | 0.021 |
| ADHD with agent HR | **1.71 (1.44–2.05)** | **1.81 (1.45–2.27)** | **1.86 (1.45–2.39)** | **1.48 (1.20–1.82)** | 0.176 |
| F-code with agent HR | **1.66 (1.41–1.95)** | **1.98 (1.60–2.46)** | **1.95 (1.53–2.48)** | **1.47 (1.20–1.81)** | 0.063 |

¹ Values are hazard ratios (HRs) and 95% confidence intervals (CIs) by age group at first hospitalization for infection in the propensity score-matched cohort.
**Boldface indicates statistical significance at p < 0.05.**
Abbreviations: IDD = Intellectual developmental disorder; DD = Pervasive developmental disorder NOS; ADHD = Attention Deficit Hyperactivity Disorder.
